# Supplementary material for: UNC119a bridges the transmission of Fyn signals to Rab11, leading to the completion of cytokinesis
Source: PubMed Central journal article supplement — Cell Cycle. 2013 Mar 27;12(8):1303–15. doi: 10.4161/cc.24404 (PMC3674094; doi:10.4161/cc.24404), 2013-03-27
Supplement: cc-12-1303-s01.pdf [file cc-12-1303-s01.pdf]

Summary of supplemental materials.

We have provided 5 supplemental figures.

**Fig. S1. Cell cycle-dependent localization of UNC119a in various cell types.**

**Fig. S2A. Membrane vesicle-associated p230 was well preserved in paraformaldehyde-fixed cells.**

**S2B. Localization of GFP-UNC119a in U2OS cells.**

**Fig. S3. Different regions of UNC119a are required for the regulated localization of the protein.**

**Fig. S4A. Cell cycle-dependent interaction of UNC119a with Rab11 and Yes.**

**S4B. Knockdown of both Rab11 isoforms has a similar inhibitory effect on the completion of cytokinesis.**

**Fig. S5A. Co-localization of Rab11a with Fyn in dividing cells.**

**S5B. UNC-Ab specifically recognizes endogenous UNC119a from mouse and human cells.**

## Supplemental Figures.

### **Fig. S1. Cell cycle-dependent localization of UNC119a in various cell types.**

**A, B.** Cell cycle-dependent localization of UNC119a in U2OS cells (A) and in NIH3T3 cells (B). Cells were double immunostained with UNC-Ab (red) and monoclonal  $\alpha$ -tubulin Ab (or monoclonal  $\gamma$ -tubulin Ab, green). Bars, 10  $\mu$ m.

**C.** Midbody localization of UNC119a in various cell types. Cells were fixed with cold methanol and double immunostained with monoclonal  $\alpha$ -tubulin Ab (green) and UNC-Ab (red). Bar, 10  $\mu$ m.

**Fig. S2A. Membrane vesicle-associated p230 was well preserved in paraformaldehyde-fixed cells.** HeLa cells were fixed in either cold methanol or 4% paraformaldehyde. Paraformaldehyde-fixed cells were permeabilized as described in Materials and Methods. Fixed cells were double immunostained with monoclonal p230-Ab (green) and UNC-Ab (red). In cold methanol-fixed cells (Cold-MeOH), UNC119a was concentrated in a spot, at the centrosome, and p230 was present around the UNC119a spot. In paraformaldehyde-fixed cells, both UNC119a and p230 were present as numerous dots. Arrows in cold methanol fixed cells indicate the concentrated UNC119a spots. Bar, 10  $\mu$ m.

**Fig. S2B. Localization of GFP-UNC119a in U2OS cells.** U2OS cells were transfected with GFP-UNC119a. After 48 h, the cells were fixed with paraformaldehyde and immunostained with monoclonal  $\gamma$ -tubulin or  $\alpha$ -tubulin Ab (red). Bars: 5  $\mu$ m, in interphase; 10  $\mu$ m, in other images.

**Fig. S3. Different regions are required for the regulated localization of UNC119a.**

**A. Construction and localization of GFP-UNC119a deletion mutants.** Human UNC119a was divided into three regions: N terminal (N, blue), amino acids 1-59; mid-region (M, yellow), amino acids 60-120; and C-terminal (C, pink), amino acids 121-240. Different regions of UNC119a were expressed in U2OS cells as a GFP fusion to examine the cellular localization of the different mutant proteins. The centrosomal localization was examined by fixing the transfected cells with cold methanol at 12 h after transfection and immunostaining the cells with monoclonal  $\gamma$ -tubulin-Ab and Alexa 546-conjugated goat anti-mouse IgG (red). To examine the midbody localization, cells were fixed with paraformaldehyde at 48 h after transfection and permeabilized with Triton X-100. Fixed cells were immunostained with monoclonal  $\alpha$ -tubulin-Ab and Alexa 546-conjugated goat anti-mouse IgG (red). Cells that overexpressed and contained aggregated GFP-proteins were not included.

**B. Centrosomal concentration of GFP-C and midbody concentration of GFP-N and GFP-M in U2OS cells.** GFP-C: Concentration of GFP-C at the centrosome. GFP-N, GFP-M, GFP-NM: Concentration of GFP-N, -M, and -NM at the midbody. GFP: control cells transfected with GFP-expression vector. The nucleus and chromosomes were stained with DAPI. White arrows indicate GFP fusion proteins localized to the midbody. White arrows indicate the midbody. Bars, 20  $\mu$ m.

**Fig. S4A. Mitosis-specific interaction of UNC119a with Rab11 and Yes.**

Immunoprecipitations (IP) were carried out using mitotic cell extracts and Rab11-Ab (**Left**) and Yes-Ab (**Right**). Western blotting experiments were performed with indicated Abs.

**Fig. S4B. Knockdown of both Rab11 isoforms has a similar inhibitory effect on the completion of cytokinesis.** HeLa cells were transfected simultaneously with Rab11a siRNA (siRab11a), Rab11b siRNA (siRab11b), or a mixture of Rab11a siRNA and Rab11b siRNA (siRab11a+b).

**Top-left.** Depletion of Rab11a and Rab11b. After 72 h, cell lysates were prepared, and Western blotting was performed with monoclonal Rab11a-Ab, polyclonal Rab11b-Ab, and monoclonal  $\alpha$ -tubulin-Ab.

**Top-right.** Inhibition of cytokinesis by Rab11a+b siRNA. The cells treated with a mixture of Rab11a siRNA and Rab11b siRNA were fixed with cold methanol and immunostained with monoclonal  $\alpha$ -tubulin-Ab and DAPI. The graphs represent the mean  $\pm$  S.D. from three independent experiments. siN.C (control siRNA): bi-nucleated cells ( $5 \pm 0.84\%$ ), cytokinetic cells ( $2.22 \pm 0.22\%$ ) (n=1,000: experiment 1, 300; experiment 2, 300; experiment 3, 400). siRab11a+b: bi-nucleated cells ( $12.22 \pm 0.4\%$ ), cytokinetic cells ( $6.56 \pm 0.73\%$ ) (n=1,000: experiment 1, 300; experiment 2, 300; experiment 3, 400). \*P < 0.05.

**Bottom.** The double siRNA treatment inhibited the localization of UNC119a to the intercellular bridge but had no effect on the centrosome/spindle pole localization of the protein. The siRNA-treated HeLa cells were fixed with cold methanol and double immunostained as described in **Fig. 3A**. Nuclei and chromosomes were stained with DAPI. Bar, 20  $\mu$ m.

**Fig. S5A. Co-localization of Rab11a with Fyn in dividing cells.** HeLa cells were transfected with GFP tagged Rab11a. 48 h after the transfection, the cells were fixed and

immunostained with Fyn-Ab. Bar, 20  $\mu$ m.

**Fig. S5B. UNC-Ab specifically recognizes endogenous UNC119a from mouse and human cells.** Cellular lysates were obtained from various cells and blotted with the indicated antibodies. Lane 1, HEK293 cell lysates; lane 2, HeLa cell lysates; lane 3, hTERT-RPE1 cell lysates; lane 4, U2OS cell lysates; lane 5, MN9D cell lysates; lane 6, MEF cell lysates; lane 7, NIH3T3 cell lysates.

A

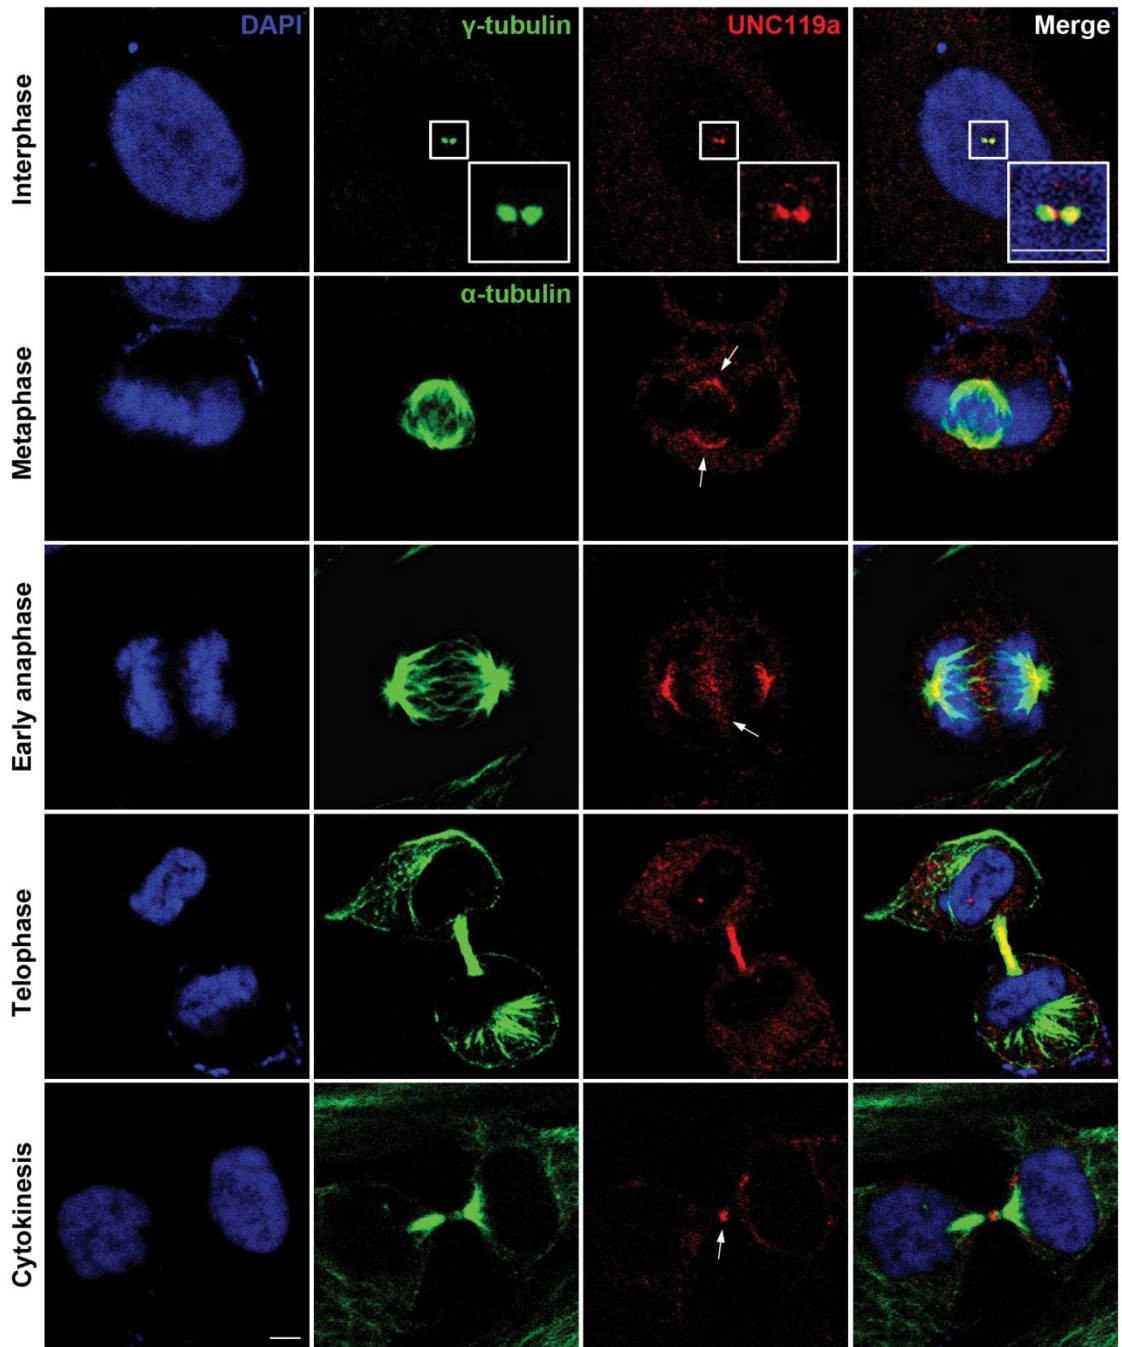

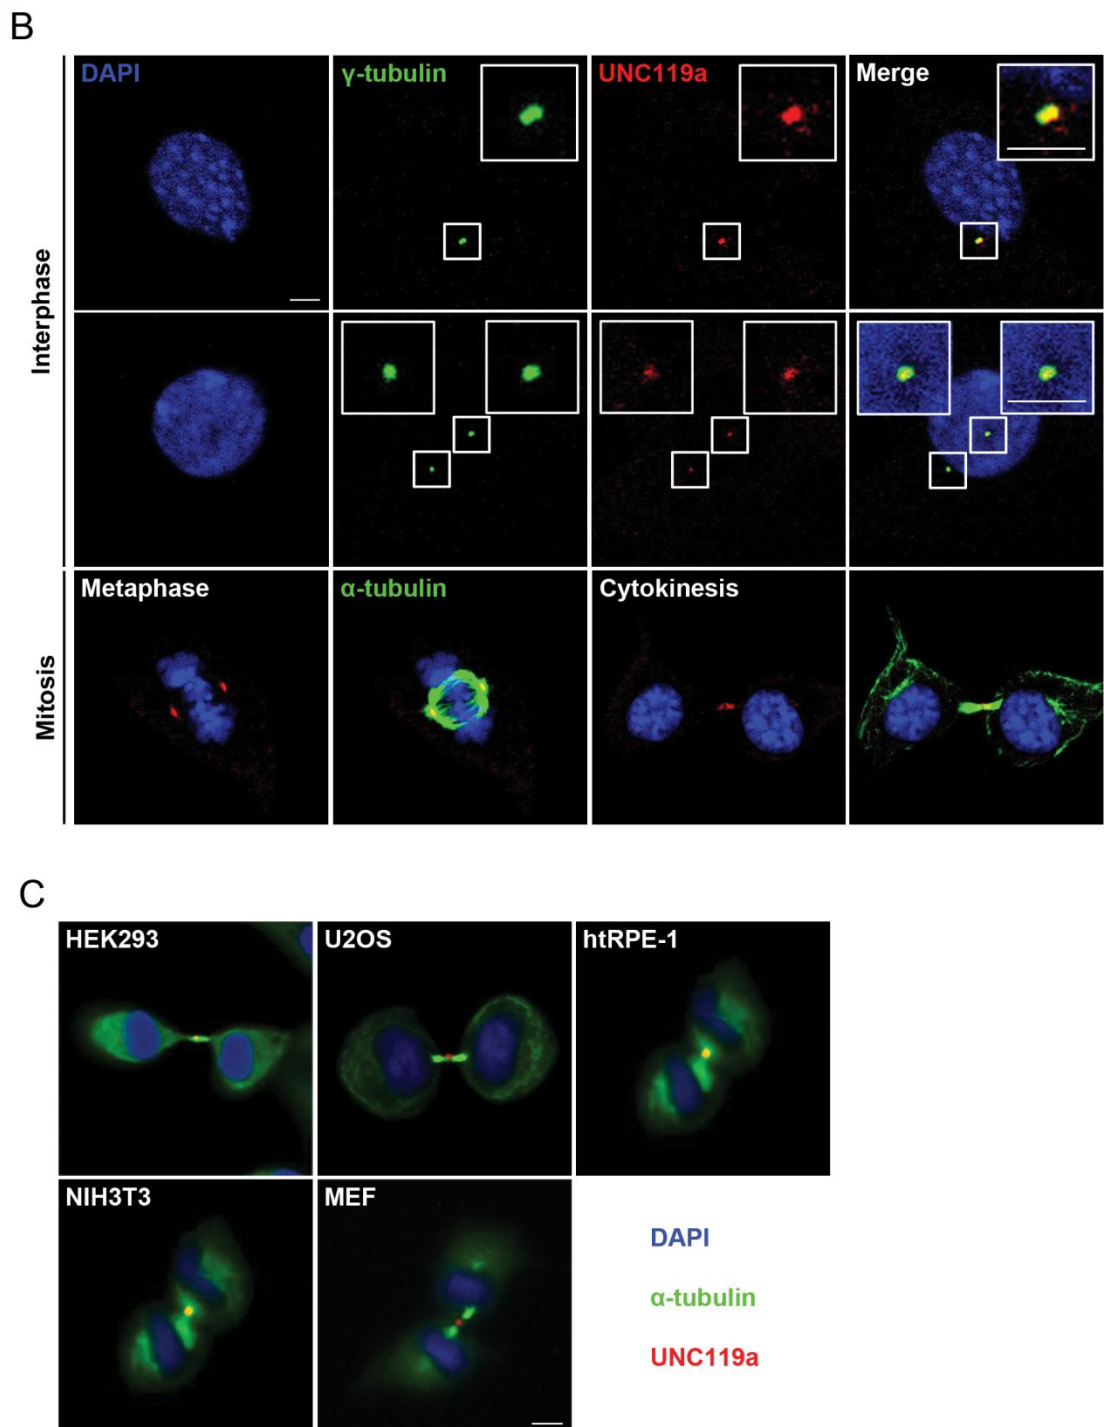

**Fig. S1. Cell cycle-dependent localization of UNC119a in various cell types.**  
**A, B.** Cell cycle-dependent localization of UNC119a in U2OS cells (A) and in NIH3T3 cells (B). Cells were double immunostained with UNC-Ab (red) and monoclonal  $\alpha$ -tubulin Ab (or monoclonal  $\gamma$ -tubulin Ab, green). Bars, 10  $\mu$ m.  
**C.** Midbody localization of UNC119a in various cell types. Cells were fixed with cold methanol and double immunostained with monoclonal  $\alpha$ -tubulin Ab (green) and UNC-Ab (red). Bar, 10  $\mu$ m.

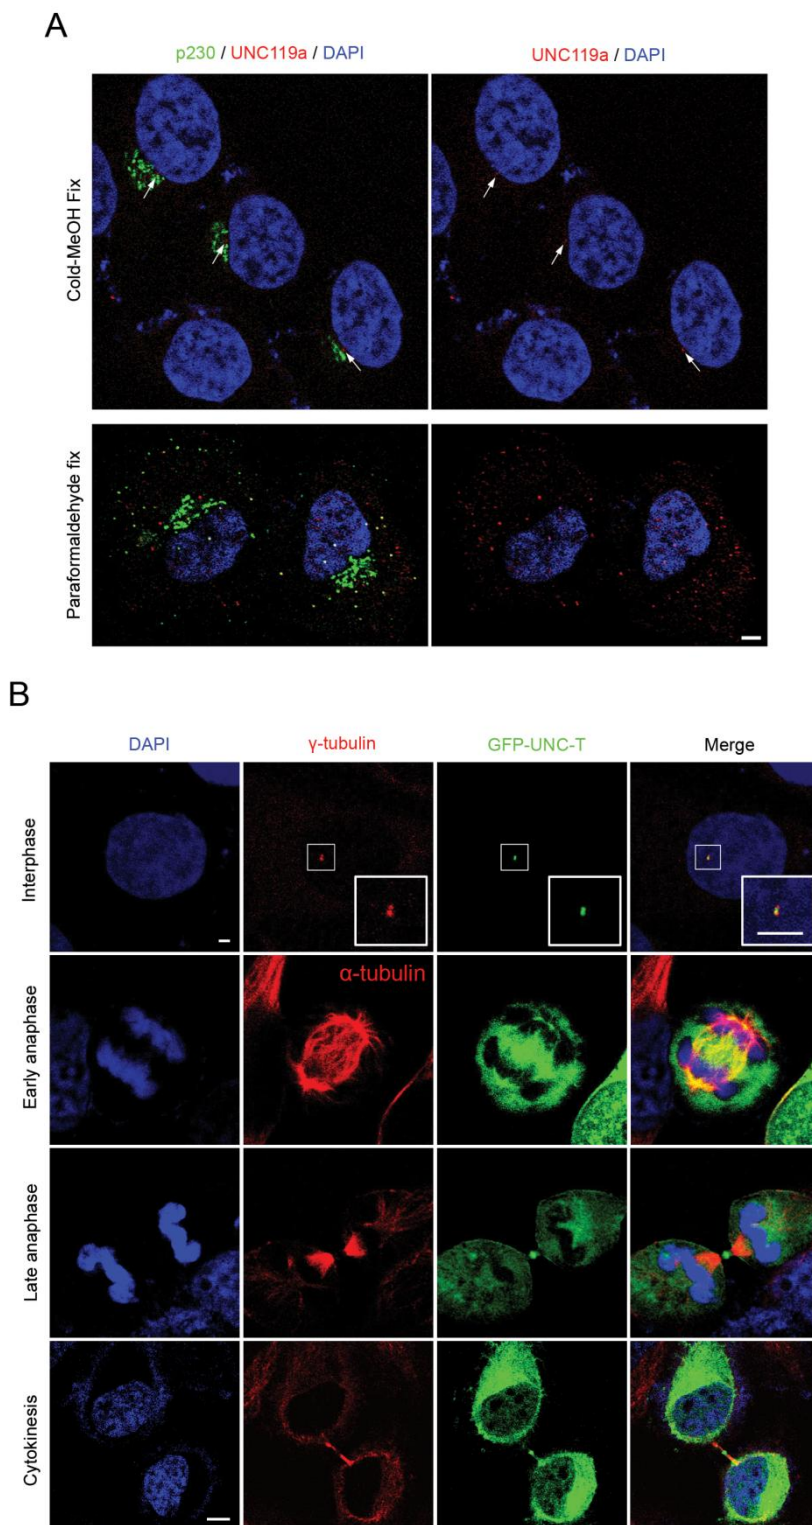

**Fig. S2A. Membrane vesicle-associated p230 was well preserved in paraformaldehyde-fixed cells.** HeLa cells were fixed in either cold methanol or 4% paraformaldehyde. Paraformaldehyde-fixed cells were permeabilized as described in Materials and Methods. Fixed cells were double immunostained with monoclonal p230-Ab (green) and UNC-Ab (red). In cold methanol-fixed cells (Cold-MeOH), UNC119a was concentrated in a spot, at the centrosome, and p230 was present around the UNC119a spot. In paraformaldehyde-fixed cells, both UNC119a and p230 were present as numerous dots. Arrows in cold methanol fixed cells indicate the concentrated UNC119a spots. Bar, 10  $\mu$ m.

**Fig. S2B. Localization of GFP-UNC119a in U2OS cells.** U2OS cells were transfected with GFP-UNC119a. After 48 h, the cells were fixed with paraformaldehyde and immunostained with monoclonal  $\gamma$ -tubulin or  $\alpha$ -tubulin Ab (red). Bars: 5  $\mu$ m, in interphase; 10  $\mu$ m, in other images.



**A**

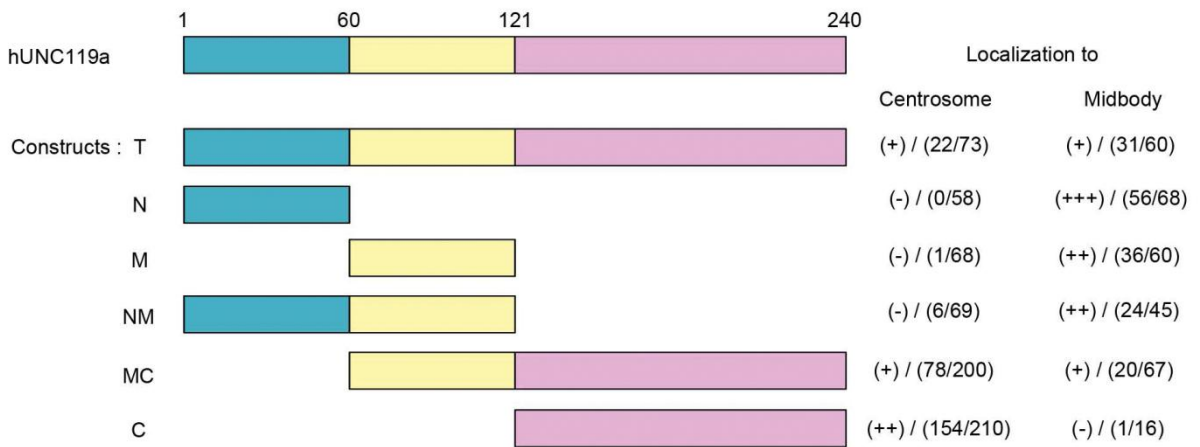

**B**

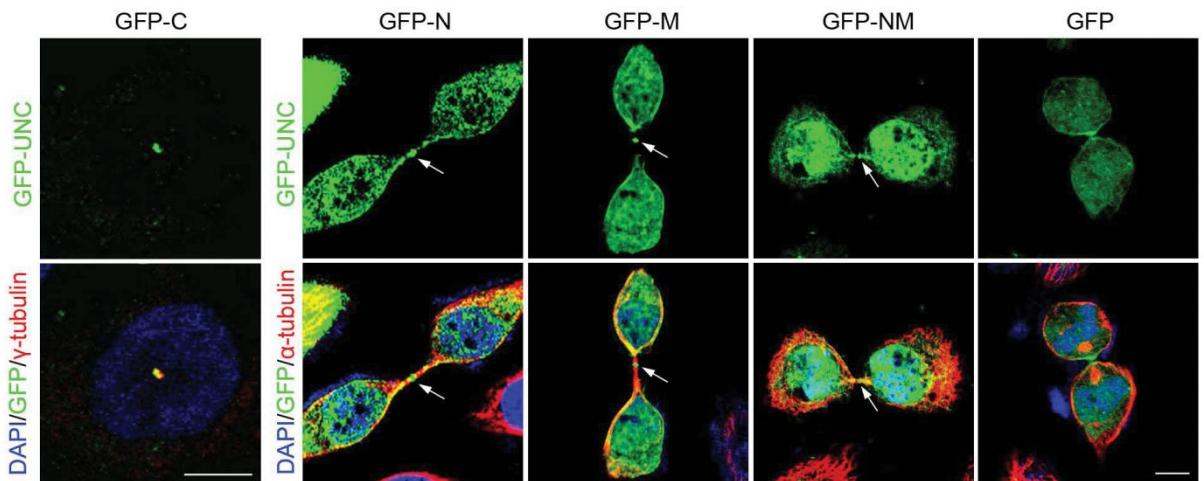

**Fig. S3. Different regions are required for the regulated localization of UNC119a.**

**A. Construction and localization of GFP-UNC119a deletion mutants.** Human UNC119a was divided into three regions: N terminal (N, blue), amino acids 1-59; mid-region (M, yellow), amino acids 60-120; and C-terminal (C, pink), amino acids 121-240. Different regions of UNC119a were expressed in U2OS cells as a GFP fusion to examine the cellular localization of the different mutant proteins. The centrosomal localization was examined by fixing the transfected cells with cold methanol at 12 h after transfection and immunostaining the cells with monoclonal  $\gamma$ -tubulin-Ab and Alexa 546-conjugated goat anti-mouse IgG (red). To examine the midbody localization, cells were fixed with paraformaldehyde at 48 h after transfection and permeabilized with Triton X-100. Fixed cells were immunostained with monoclonal  $\alpha$ -tubulin-Ab and Alexa 546-conjugated goat anti-mouse IgG (red). Cells that overexpressed and contained aggregated GFP-proteins were not included.

**B. Centrosomal concentration of GFP-C and midbody concentration of GFP-N and GFP-M in U2OS cells.** GFP-C: Concentration of GFP-C at the centrosome. GFP-N, GFP-M, GFP-NM: Concentration of GFP-N, -M, and -NM at the midbody. GFP: control cells transfected with GFP-expression vector. The nucleus and chromosomes were stained with DAPI. White arrows indicate GFP fusion proteins localized to the midbody. White arrows indicate the midbody. Bars, 20  $\mu$ m.

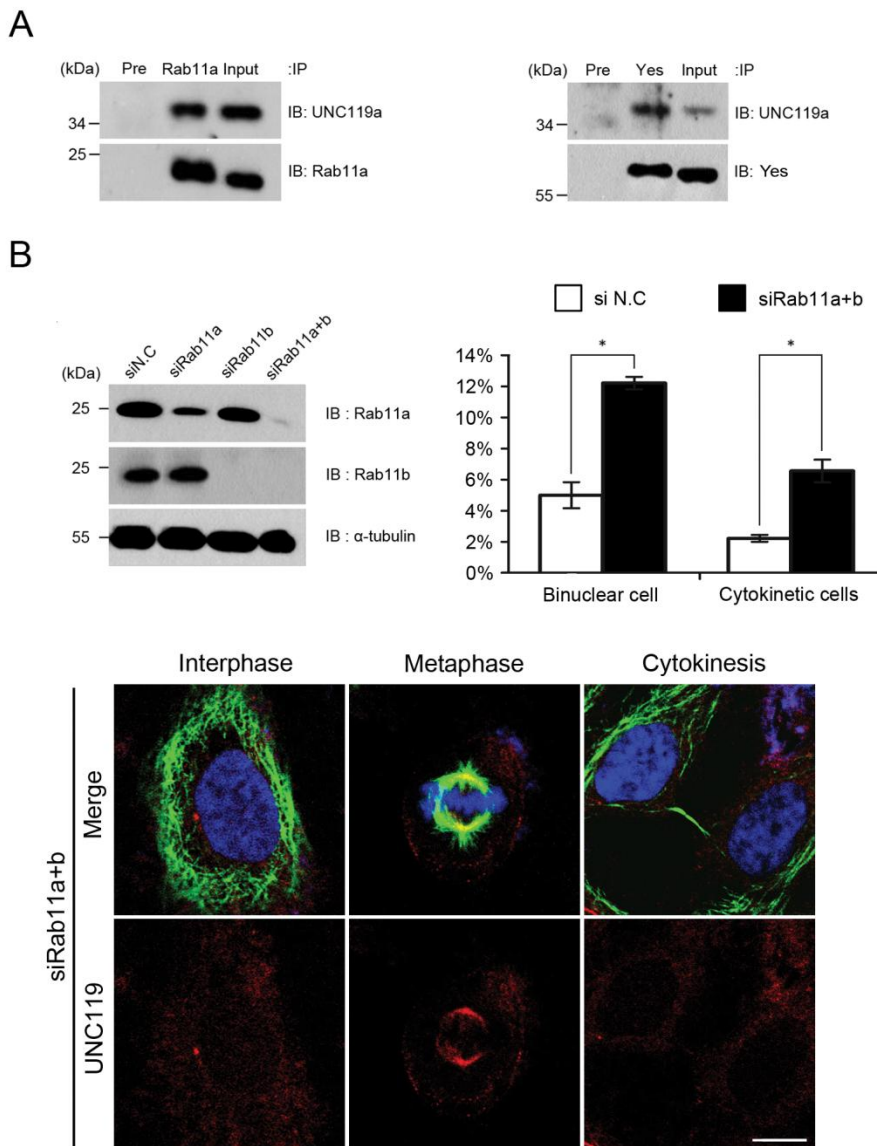

**Fig. S4A. Mitosis-specific interaction of UNC119a with Rab11 and Yes.**

Immunoprecipitations (IP) were carried out using mitotic cell extracts and Rab11-Ab (**Left**) and Yes-Ab (**Right**). Western blotting experiments were performed with indicated Abs.

**Fig. S4B. Knockdown of both Rab11 isoforms has a similar inhibitory effect on the completion of cytokinesis.** HeLa cells were transfected simultaneously with Rab11a siRNA (siRab11a), Rab11b siRNA (siRab11b), or a mixture of Rab11a siRNA and Rab11b siRNA (siRab11a+b).

**Top-left.** Depletion of Rab11a and Rab11b. After 72 h, cell lysates were prepared, and Western blotting was performed with monoclonal Rab11a-Ab, polyclonal Rab11b-Ab, and monoclonal  $\alpha$ -tubulin-Ab.

**Top-right.** Inhibition of cytokinesis by Rab11a+b siRNA. The cells treated with a mixture of Rab11a siRNA and Rab11b siRNA were fixed with cold methanol and immunostained with monoclonal  $\alpha$ -tubulin-Ab and DAPI. The graphs represent the mean  $\pm$  S.D. from three independent experiments. siN.C (control siRNA): bi-nucleated cells ( $5 \pm 0.84\%$ ), cytokinetic cells ( $2.22 \pm 0.22\%$ ) ( $n=1,000$ : experiment 1, 300; experiment 2, 300; experiment 3, 400). siRab11a+b: bi-nucleated cells ( $12.22 \pm 0.4\%$ ), cytokinetic cells ( $6.56 \pm 0.73\%$ ) ( $n=1,000$ : experiment 1, 300; experiment 2, 300; experiment 3, 400). \* $P < 0.05$ .

**Bottom.** The double siRNA treatment inhibited the localization of UNC119a to the intercellular bridge but had no effect on the centrosome/spindle pole localization of the protein. The siRNA-treated HeLa cells were fixed with cold methanol and double immunostained as described in **Fig. 3A**. Nuclei and chromosomes were stained with DAPI. Bar, 20  $\mu$ m.

**A**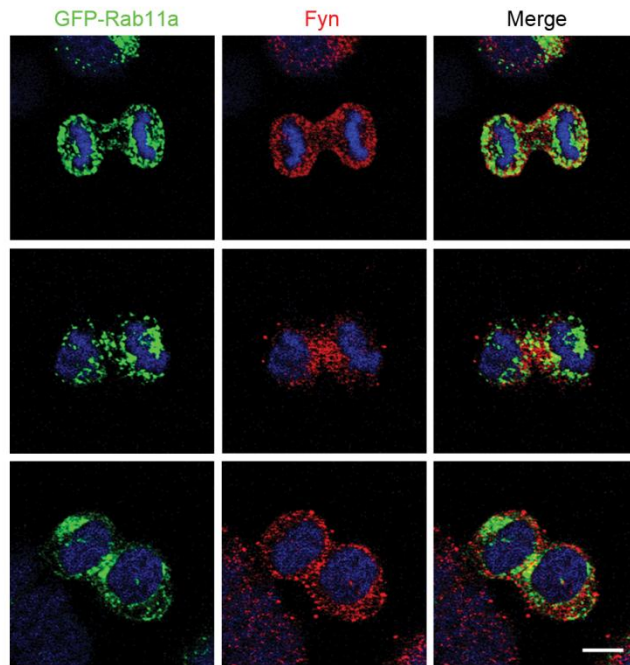**B**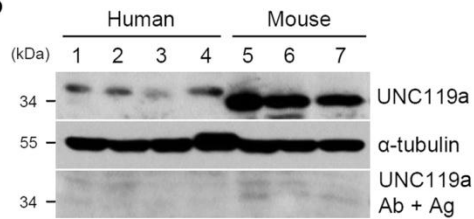

**Fig. S5A. Co-localization of Rab11a with Fyn in dividing cells.** HeLa cells were transfected with GFP tagged Rab11a. 48 h after the transfection, the cells were fixed and immunostained with Fyn-Ab. Bar, 20  $\mu$ m.

**Fig. S5B. UNC-Ab specifically recognizes endogenous UNC119a from mouse and human cells.** Cellular lysates were obtained from various cells and blotted with the indicated antibodies. Lane 1, HEK293 cell lysates; lane 2, HeLa cell lysates; lane 3, hTERT-RPE1 cell lysates; lane 4, U2OS cell lysates; lane 5, MN9D cell lysates; lane 6, MEF cell lysates; lane 7, NIH3T3 cell lysates.
